# Supplementary material for: CRISPR/Cas9-Mediated Deletion of Large Genomic Fragments in Soybean
Source: PubMed Central journal article supplement (PMC6321276; doi:10.3390/ijms19123835), 2018-12-01
Supplement: ijms-19-03835-s001.pdf [file ijms-19-03835-s001.pdf]

**Table S1.** Primer sequences used in the present study.

| <b>Primer Name</b> | <b>Primer Sequence</b>    | <b>Purpose</b>                                                                                      |
|--------------------|---------------------------|-----------------------------------------------------------------------------------------------------|
| Primer1            | ATTCATAACAAAGCAAACGAG     | To amplify the region spanning the target site <i>GmFT2a</i> -D1                                    |
| Primer2            | ACTTGACCTTCCCTTAAACAC     |                                                                                                     |
| Primer3            | TTGATCCCGATGCACCTAGC      |                                                                                                     |
| Primer4            | CTAGCAAGCAAACATTGTGCG     | To amplify the region spanning the target site <i>GmFT2a</i> -D2                                    |
| Primer5            | TGAGCGTCAAAGTAGATCAAG     | To amplify the region spanning the target site <i>GmFT2a</i> -D3                                    |
| Primer6            | CTTGCTGCTACCAACTGAGC      |                                                                                                     |
| Primer7            | ATCGACCGATCGAGGACAAC      |                                                                                                     |
| Primer8            | TGGGAGACTACAGAAGCAAAGA    | To amplify the region spanning the target site <i>GmFT5a</i> -D1                                    |
| Primer9            | ACCACAAATGCAAGCTTTGGTAA   | To amplify the region spanning the target site <i>GmFT5a</i> -D2                                    |
| Primer10           | TCAGCTGGAGTAAGGCATCCA     |                                                                                                     |
| Primer11           | ACCCGTCAAGATCTCTTTATT     |                                                                                                     |
| Primer12           | ACGAGTTTAGGAATCAGTGTTCA   | To detect large fragment deletions between the target sites <i>GmFT2a</i> -D1 and <i>GmFT2a</i> -D2 |
| Primer13           | TCAAACACAATGGAATCGAGGC    | To detect large fragment deletions between the target sites <i>GmFT2a</i> -D1 and <i>GmFT2a</i> -D3 |
| Primer14           | CACCCACACAAATCCGAAAGT     |                                                                                                     |
| Primer15           | GGAGAAAAGAAAACATTCATCG    |                                                                                                     |
| Primer16           | CTCTAAAGTATCAGCTGGAGTAAGG | To detect large fragment deletions between the target sites <i>GmFT5a</i> -D1 and <i>GmFT5a</i> -D2 |
| <i>GmActin</i> -F  | CGGTGGTTCTATCTTGGCATC     | To amplify <i>GmActin</i> as a normalization control.                                               |
| <i>GmActin</i> -R  | GTCTTTCGCTTCAATAACCCTA    |                                                                                                     |
| Cas9-F             | TTGGGGCTCACACCAAACCTT     | To amplify part of the Cas9 coding sequence                                                         |
| Cas9-R             | CGATCGCCTTCTTTTGCTCG      |                                                                                                     |
